# Supplementary figures and images for: Remote ischaemic conditioning in necrotising enterocolitis: a phase I feasibility and safety study
Source: HighWire-hosted journal article supplement (doi:10.1136/archdischild-2022-324174), 2022-08-08

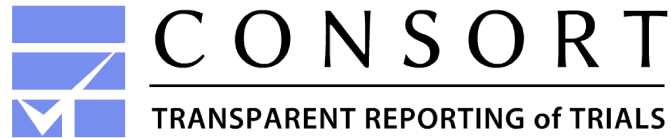

### CONSORT 2010 Flow Diagram

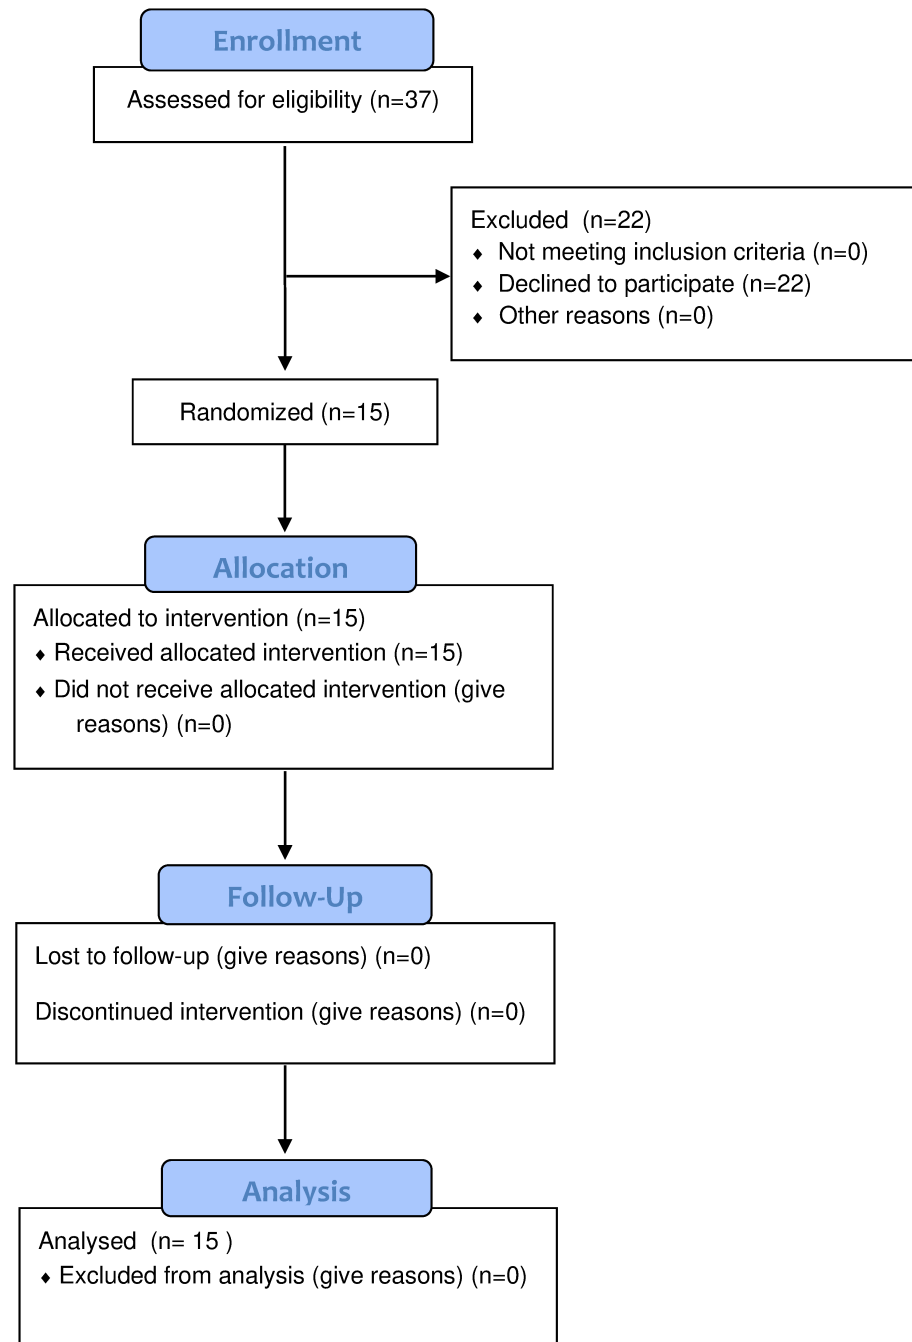

Supplement: archdischild-2022-324174supp001_data_supplement.pdf [file archdischild-2022-324174supp001_data_supplement.pdf]
